# Supplementary material
Source: PubMed Central journal article supplement (PMC7438242)
Supplement: NIHMS1551458-supplement-1.pdf [file NIHMS1551458-supplement-1.pdf]

**Supplementary Table 1. Natural Direct, Natural Indirect, and Total Effects of Maternal Pre-Pregnancy Overweight/Obesity on Child's Overweight/Obesity for Measures of Birth Anthropometry and in the Presence of Multiple Mediators among Offspring Born Full-Term<sup>a,b</sup>**

|                                  | Birth anthropometry |                  | Birth anthropometry + gestational weight gain |                  | Birth anthropometry + gestational diabetes |                  | Birth anthropometry + hypertensive disorders of pregnancy |                  |
|----------------------------------|---------------------|------------------|-----------------------------------------------|------------------|--------------------------------------------|------------------|-----------------------------------------------------------|------------------|
|                                  | OR (95% CI)         | Percent Mediated | OR (95% CI)                                   | Percent Mediated | OR (95% CI)                                | Percent Mediated | OR (95% CI)                                               | Percent Mediated |
| <b>Birthweight</b>               |                     |                  |                                               |                  |                                            |                  |                                                           |                  |
| Natural direct effect            | 1.63 (1.27, 2.08)   |                  | 1.65 (1.28, 2.10)                             |                  | 1.62 (1.26, 2.04)                          |                  | 1.61 (1.25, 2.06)                                         |                  |
| Natural indirect effect          | 1.07 (1.03, 1.12)   | 16.20%           | 1.07 (1.02, 1.12)                             | 14.68%           | 1.08 (1.03, 1.12)                          | 16.99%           | 1.09 (1.03, 1.15)                                         | 19.08%           |
| Total effect                     | 1.75 (1.37, 2.24)   |                  | 1.76 (1.37, 2.24)                             |                  | 1.75 (1.36, 2.20)                          |                  | 1.75 (1.36, 2.24)                                         |                  |
| <b>Birth Length</b>              |                     |                  |                                               |                  |                                            |                  |                                                           |                  |
| Natural direct effect            | 1.73 (1.37, 2.22)   |                  | 1.76 (1.38, 2.24)                             |                  | 1.72 (1.33, 2.20)                          |                  | 1.72 (1.35, 2.18)                                         |                  |
| Natural indirect effect          | 1.02 (1.00, 1.04)   | 4.22%            | 1.01 (0.97, 1.04)                             | 1.43%            | 1.02 (1.00, 1.05)                          | 5.55%            | 1.03 (0.99, 1.07)                                         | 6.61%            |
| Total effect                     | 1.77 (1.39, 2.25)   |                  | 1.77 (1.39, 2.26)                             |                  | 1.76 (1.36, 2.25)                          |                  | 1.77 (1.39, 2.24)                                         |                  |
| <b>Birth Head Circumference</b>  |                     |                  |                                               |                  |                                            |                  |                                                           |                  |
| Natural direct effect            | 1.66 (1.28, 2.13)   |                  | 1.68 (1.31, 2.15)                             |                  | 1.63 (1.27, 2.09)                          |                  | 1.64 (1.26, 2.08)                                         |                  |
| Natural indirect effect          | 1.04 (1.01, 1.07)   | 9.81%            | 1.03 (0.99, 1.08)                             | 7.23%            | 1.05 (1.01, 1.09)                          | 11.68%           | 1.06 (1.01, 1.10)                                         | 12.50%           |
| Total effect                     | 1.73 (1.33, 2.22)   |                  | 1.74 (1.36, 2.21)                             |                  | 1.71 (1.34, 2.19)                          |                  | 1.73 (1.33, 2.19)                                         |                  |
| <b>Birth Ponderal Index</b>      |                     |                  |                                               |                  |                                            |                  |                                                           |                  |
| Natural direct effect            | 1.75 (1.36, 2.24)   |                  | 1.77 (1.37, 2.25)                             |                  | 1.74 (1.3, 2.20)                           |                  | 1.72 (1.33, 2.18)                                         |                  |
| Natural indirect effect          | 1.01 (0.99, 1.03)   | 3.13%            | 1.01 (0.97, 1.04)                             | 1.17%            | 1.02 (0.99, 1.04)                          | 4.05%            | 1.03 (0.99, 1.07)                                         | 7.08%            |
| Total effect                     | 1.77 (1.36, 2.27)   |                  | 1.77 (1.38, 2.26)                             |                  | 1.77 (1.38, 2.24)                          |                  | 1.77 (1.38, 2.24)                                         |                  |
| <b>Small-for-Gestational-Age</b> |                     |                  |                                               |                  |                                            |                  |                                                           |                  |
| Natural direct effect            | 1.64 (1.25, 2.12)   |                  | 1.68 (1.29, 2.15)                             |                  | 1.63 (1.24, 2.09)                          |                  | 1.63 (1.26, 2.08)                                         |                  |
| Natural indirect effect          | 1.01 (1.00, 1.03)   | 3.62%            | 1.00 (0.97, 1.04)                             | 0.37%            | 1.02 (0.99, 1.05)                          | 5.29%            | 1.03 (0.98, 1.07)                                         | 6.20%            |
| Total effect                     | 1.66 (1.27, 2.15)   |                  | 1.68 (1.30, 2.15)                             |                  | 1.66 (1.27, 2.13)                          |                  | 1.67 (1.30, 2.13)                                         |                  |
| <b>Large-for-Gestational-Age</b> |                     |                  |                                               |                  |                                            |                  |                                                           |                  |
| Natural direct effect            | 1.81 (1.38, 2.38)   |                  | 1.85 (1.42, 2.40)                             |                  | 1.80 (1.37, 2.35)                          |                  | --                                                        |                  |
| Natural indirect effect          | 1.02 (0.99, 1.06)   | 4.96%            | 1.01 (0.96, 1.06)                             | 1.64%            | 1.03 (0.99, 1.07)                          | 6.75%            | --                                                        | --               |
| Total effect                     | 1.86 (1.41, 2.39)   |                  | 1.87 (1.43, 2.41)                             |                  | 1.86 (1.42, 2.41)                          |                  | --                                                        |                  |

<sup>a</sup>Model adjusted for maternal & child sociodemographics (maternal age, maternal education, maternal insurance, maternal smoking, first birth, child's sex, and child's age)

<sup>b</sup>n=3661 mother-child dyads with children born full-term (≥37 weeks) examined using imputation-based methods, which fit a working model for the outcome mean

**Supplementary Table 2. Natural Direct, Natural Indirect, and Total Effects of Maternal Pre-Pregnancy Obesity on Child's Obesity for Measures of Birth Anthropometry and in the Presence of Multiple Mediators<sup>a,b</sup>**

|                                  | Birth anthropometry |                  | Birth anthropometry + gestational weight gain |                  | Birth anthropometry + gestational diabetes |                  | Birth anthropometry + hypertensive disorders of pregnancy |                  |
|----------------------------------|---------------------|------------------|-----------------------------------------------|------------------|--------------------------------------------|------------------|-----------------------------------------------------------|------------------|
|                                  | OR (95% CI)         | Percent Mediated | OR (95% CI)                                   | Percent Mediated | OR (95% CI)                                | Percent Mediated | OR (95% CI)                                               | Percent Mediated |
| <b>Birthweight</b>               |                     |                  |                                               |                  |                                            |                  |                                                           |                  |
| Natural direct effect            | 2.91 (1.95, 4.17)   |                  | 3.07 (2.07, 4.40)                             |                  | 2.89 (1.92, 4.15)                          |                  | 2.84 (1.86, 4.16)                                         |                  |
| Natural indirect effect          | 1.12 (1.04, 1.20)   | 15.79%           | 1.07 (0.97, 1.18)                             | 9.73%            | 1.13 (1.04, 1.22)                          | 16.39%           | 1.15 (1.03, 1.27)                                         | 18.56%           |
| Total effect                     | 3.27 (2.20, 4.64)   |                  | 3.29 (2.23, 4.68)                             |                  | 3.26 (2.18, 4.63)                          |                  | 3.26 (2.15, 4.71)                                         |                  |
| <b>Birth Length</b>              |                     |                  |                                               |                  |                                            |                  |                                                           |                  |
| Natural direct effect            | 3.08 (2.11, 4.38)   |                  | 3.25 (2.21, 4.67)                             |                  | 3.06 (2.10, 4.44)                          |                  | 3.01 (2.04, 4.33)                                         |                  |
| Natural indirect effect          | 1.05 (1.00, 1.09)   | 6.27%            | 1.00 (0.93, 1.07)                             | --               | 1.05 (0.99, 1.12)                          | 7.33%            | 1.06 (0.98, 1.15)                                         | 8.70%            |
| Total effect                     | 3.22 (2.21, 4.55)   |                  | 3.25 (2.22, 4.64)                             |                  | 3.22 (2.21, 4.64)                          |                  | 3.21 (2.18, 4.59)                                         |                  |
| <b>Birth Head Circumference</b>  |                     |                  |                                               |                  |                                            |                  |                                                           |                  |
| Natural direct effect            | 3.11 (2.10, 4.42)   |                  | 3.29 (2.26, 4.62)                             |                  | 3.03 (2.02, 4.45)                          |                  | 3.08 (2.06, 4.43)                                         |                  |
| Natural indirect effect          | 1.04 (0.99, 1.09)   | 5.35%            | 0.99 (0.91, 1.06)                             | --               | 1.05 (0.98, 1.12)                          | 6.95%            | 1.05 (0.96, 1.13)                                         | 6.34%            |
| Total effect                     | 3.23 (2.19, 4.57)   |                  | 3.24 (2.23, 4.54)                             |                  | 3.18 (2.12, 4.64)                          |                  | 3.22 (2.15, 4.6)                                          |                  |
| <b>Birth Ponderal Index</b>      |                     |                  |                                               |                  |                                            |                  |                                                           |                  |
| Natural direct effect            | 3.26 (2.21, 4.51)   |                  | 3.42 (2.30, 4.87)                             |                  | 3.24 (2.19, 4.57)                          |                  | 3.2 (2.17, 4.55)                                          |                  |
| Natural indirect effect          | 1.02 (0.98, 1.05)   | 2.28%            | 0.97 (0.91, 1.04)                             | --               | 1.02 (0.98, 1.07)                          | 3.00%            | 1.04 (0.96, 1.11)                                         | 4.87%            |
| Total effect                     | 3.31 (2.25, 4.59)   |                  | 3.31 (2.23, 4.75)                             |                  | 3.31 (2.24, 4.67)                          |                  | 3.31 (2.24, 4.7)                                          |                  |
| <b>Small-for-Gestational-Age</b> |                     |                  |                                               |                  |                                            |                  |                                                           |                  |
| Natural direct effect            | 3.12 (2.08, 4.40)   |                  | 3.34 (2.22, 4.82)                             |                  | 3.07 (2.06, 4.42)                          |                  | 3.07 (2.01, 4.51)                                         |                  |
| Natural indirect effect          | 1.03 (0.99, 1.06)   | 4.03%            | 0.96 (0.90, 1.04)                             | --               | 1.04 (0.99, 1.10)                          | 5.81%            | 1.05 (0.96, 1.14)                                         | 6.76%            |
| Total effect                     | 3.21 (2.14, 4.52)   |                  | 3.22 (2.14, 4.69)                             |                  | 3.20 (2.14, 4.61)                          |                  | 3.22 (2.10, 4.74)                                         |                  |
| <b>Large-for-Gestational-Age</b> |                     |                  |                                               |                  |                                            |                  |                                                           |                  |
| Natural direct effect            | 3.26 (2.10, 4.83)   |                  | 3.50 (2.31, 5.13)                             |                  | 3.20 (2.11, 4.72)                          |                  | 3.17 (2.05, 4.71)                                         |                  |
| Natural indirect effect          | 1.04 (0.98, 1.11)   | 5.61%            | 0.98 (0.88, 1.07)                             | --               | 1.06 (0.98, 1.14)                          | 8.02%            | 1.08 (0.98, 1.18)                                         | 9.90%            |
| Total effect                     | 3.39 (2.19, 5.01)   |                  | 3.41 (2.27, 4.96)                             |                  | 3.39 (2.25, 4.99)                          |                  | 3.41 (2.21, 5.04)                                         |                  |

<sup>a</sup>Model adjusted for maternal & child sociodemographics (maternal age, maternal education, maternal insurance, maternal smoking, first birth, child's sex, and child's age)

<sup>b</sup>n=2820 obese or normal weight mother-children dyads examined using imputation-based methods, which fit a working model for the outcome mean

**Supplementary Table 3. Natural Direct, Natural Indirect, and Total Effects of Maternal Pre-Pregnancy Overweight/Obesity on Child's Overweight/Obesity for Measures of Birth Anthropometry and in the Presence of Multiple Mediators among African Americans<sup>a,b</sup>**

|                                  | Birth anthropometry |                  | Birth anthropometry + gestational weight gain |                  | Birth anthropometry + gestational diabetes |                  | Birth anthropometry + hypertensive disorders of pregnancy |                  |
|----------------------------------|---------------------|------------------|-----------------------------------------------|------------------|--------------------------------------------|------------------|-----------------------------------------------------------|------------------|
|                                  | OR (95% CI)         | Percent Mediated | OR (95% CI)                                   | Percent Mediated | OR (95% CI)                                | Percent Mediated | OR (95% CI)                                               | Percent Mediated |
| <b>Birthweight</b>               |                     |                  |                                               |                  |                                            |                  |                                                           |                  |
| Natural direct effect            | 1.68 (1.33, 2.10)   |                  | 1.68 (1.32, 2.12)                             |                  | 1.68 (1.33, 2.10)                          |                  | 1.66 (1.31, 2.09)                                         |                  |
| Natural indirect effect          | 1.06 (1.02, 1.09)   | 12.60%           | 1.06 (1.01, 1.11)                             | 12.79%           | 1.06 (1.02, 1.10)                          | 13.01%           | 1.07 (1.02, 1.12)                                         | 14.44%           |
| Total effect                     | 1.78 (1.40, 2.22)   |                  | 1.78 (1.40, 2.24)                             |                  | 1.78 (1.41, 2.22)                          |                  | 1.78 (1.40, 2.22)                                         |                  |
| <b>Birth Length</b>              |                     |                  |                                               |                  |                                            |                  |                                                           |                  |
| Natural direct effect            | 1.74 (1.39, 2.20)   |                  | 1.76 (1.39, 2.20)                             |                  | 1.73 (1.38, 2.16)                          |                  | 1.73 (1.36, 2.17)                                         |                  |
| Natural indirect effect          | 1.02 (1.00, 1.04)   | 4.05%            | 1.01 (0.98, 1.05)                             | 2.76%            | 1.02 (0.99, 1.05)                          | 4.78%            | 1.02 (0.99, 1.06)                                         | 5.48%            |
| Total effect                     | 1.77 (1.42, 2.24)   |                  | 1.78 (1.41, 2.23)                             |                  | 1.77 (1.41, 2.20)                          |                  | 1.77 (1.40, 2.22)                                         |                  |
| <b>Birth Head Circumference</b>  |                     |                  |                                               |                  |                                            |                  |                                                           |                  |
| Natural direct effect            | 1.71 (1.35, 2.14)   |                  | 1.71 (1.36, 2.13)                             |                  | 1.69 (1.33, 2.15)                          |                  | 1.7 (1.33, 2.14)                                          |                  |
| Natural indirect effect          | 1.03 (1.00, 1.05)   | 6.11%            | 1.02 (0.98, 1.06)                             | 5.13%            | 1.03 (1.00, 1.06)                          | 6.94%            | 1.03 (0.99, 1.07)                                         | 7.22%            |
| Total effect                     | 1.75 (1.39, 2.19)   |                  | 1.75 (1.40, 2.17)                             |                  | 1.74 (1.37, 2.22)                          |                  | 1.75 (1.37, 2.2)                                          |                  |
| <b>Birth Ponderal Index</b>      |                     |                  |                                               |                  |                                            |                  |                                                           |                  |
| Natural direct effect            | 1.76 (1.38, 2.21)   |                  | 1.77 (1.39, 2.23)                             |                  | 1.76 (1.39, 2.20)                          |                  | 1.75 (1.38, 2.19)                                         |                  |
| Natural indirect effect          | 1.01 (0.99, 1.02)   | 1.83%            | 1.00 (0.97, 1.03)                             | 0.49%            | 1.01 (0.99, 1.03)                          | 2.62%            | 1.02 (0.98, 1.05)                                         | 4.09%            |
| Total effect                     | 1.78 (1.39, 2.23)   |                  | 1.78 (1.40, 2.23)                             |                  | 1.78 (1.40, 2.22)                          |                  | 1.78 (1.40, 2.22)                                         |                  |
| <b>Small-for-Gestational-Age</b> |                     |                  |                                               |                  |                                            |                  |                                                           |                  |
| Natural direct effect            | 1.72 (1.34, 2.16)   |                  | 1.74 (1.37, 2.2)                              |                  | 1.71 (1.34, 2.20)                          |                  | 1.72 (1.34, 2.20)                                         |                  |
| Natural indirect effect          | 1.01 (0.99, 1.02)   | 1.84%            | 1.00 (0.97, 1.04)                             | 0.22%            | 1.01 (0.99, 1.04)                          | 2.97%            | 1.01 (0.98, 1.05)                                         | 3.43%            |
| Total effect                     | 1.73 (1.35, 2.18)   |                  | 1.74 (1.38, 2.2)                              |                  | 1.73 (1.36, 2.23)                          |                  | 1.74 (1.36, 2.23)                                         |                  |
| <b>Large-for-Gestational-Age</b> |                     |                  |                                               |                  |                                            |                  |                                                           |                  |
| Natural direct effect            | 1.83 (1.41, 2.33)   |                  | 1.85 (1.44, 2.38)                             |                  | 1.82 (1.40, 2.35)                          |                  | --                                                        |                  |
| Natural indirect effect          | 1.02 (0.99, 1.05)   | 3.98%            | 1.01 (0.97, 1.05)                             | 2.23%            | 1.02 (0.99, 1.06)                          | 5.18%            | --                                                        | --               |
| Total effect                     | 1.87 (1.44, 2.37)   |                  | 1.87 (1.45, 2.40)                             |                  | 1.87 (1.43, 2.41)                          |                  | --                                                        |                  |

<sup>a</sup>Model adjusted for maternal & child sociodemographics (maternal age, maternal education, maternal insurance, maternal smoking, first birth, child's sex, and child's age)

<sup>b</sup>n=2376 African American mother-child dyads examined using imputation-based methods, which fit a working model for the outcome mean
